# Supplementary material
Source: PubMed Central journal article supplement (PMC3345012)
Supplement: 1117039109_pnas.1117039109_SI.pdf [file 1117039109_pnas.1117039109_SI.pdf]

# Supporting Information

Finnegan et al. 10.1073/pnas.1117039109

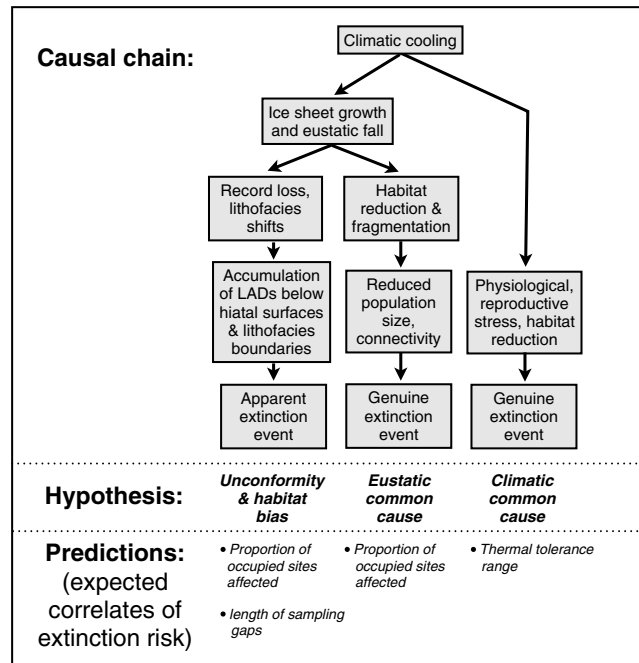

Fig. S1. Causal chains and predicted selective signatures of the hypotheses discussed in the main text.

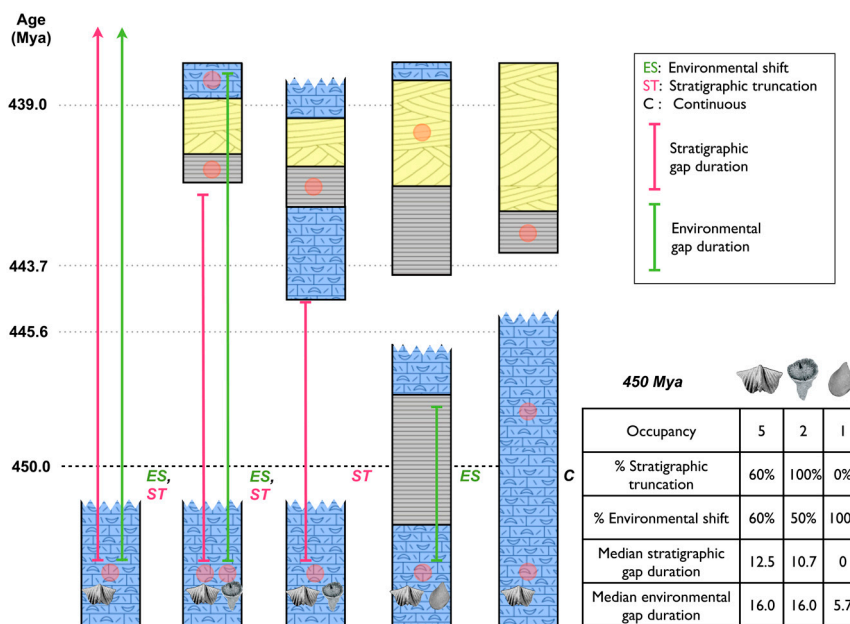

Fig. S2. Simplified hypothetical illustration of the procedure used to calculate gap-related statistics for each genus in each time interval. Paleobiology database collections (red dots) and associated occurrences (depicted only for interval 1) were matched to units in local stratigraphic columns based on stratigraphic nomenclature and geographic coordinates. Each interval boundary in each section containing rock of the appropriate age is assigned one or more of three possible upper stratigraphic boundary types—continuous, environmental truncation (shift), and/or stratigraphic truncation. Both stratigraphic and environmental gap durations in each column are calculated based on the median age of each interval, with intra-interval gaps assigned an arbitrary duration of 0.5 million y; stratigraphically or environmentally continuous sections were assigned gap durations of 0.0. For each genus the total number of different types of gap duration, and the distribution of gaps (if any) is tabulated and percent truncation, percent environmental truncation, median stratigraphic gap duration, and median environmental gap duration calculated.



**Table S1. Results of likelihood ratio tests comparing nested logistic regression models for each interval**

| Interval     | Stratigraphic gaps |                 |                       | Environmental gaps |                 |                       |
|--------------|--------------------|-----------------|-----------------------|--------------------|-----------------|-----------------------|
|              | # Genera affected  | %trunc <i>p</i> | Gap duration <i>p</i> | # Genera affected  | %trunc <i>p</i> | Gap duration <i>p</i> |
| Wenlockian   | 94                 | 0.341           | 0.064                 | 539                | <b>0.021</b>    | 0.076                 |
| Telychian    | 182                | <b>0.007</b>    | 0.564                 | 151                | 0.847           | 0.62                  |
| Aeronian     | 8                  | 1               | 1                     | 126                | 0.208           | 0.293                 |
| Rhuddanian   | 0                  | NA              | NA                    | 34                 | 1               | 0.425                 |
| Hirnantian   | 126                | 0.511           | 0.102                 | 10                 | 0.054           | 1                     |
| l. Katian    | 400                | <b>0.003</b>    | 0.906                 | 150                | <b>&lt;.001</b> | 0.123                 |
| e. Katian    | 376                | <b>&lt;.001</b> | <b>0.006</b>          | 553                | <b>0.022</b>    | 0.646                 |
| Sandbian     | 262                | 0.07            | 0.865                 | 465                | <b>&lt;.001</b> | 0.262                 |
| Darriwillian | 113                | 0.463           | <b>&lt;.001</b>       | 220                | 0.447           | 0.214                 |
| Dapingian    | 59                 | 0.71            | <b>0.024</b>          | 197                | <b>0.001</b>    | 0.18                  |

Each test is based on the subset of genera in each interval that experienced at least some stratigraphic or environmental truncation. % truncation *p* is the significance of the difference in fit between a model that includes percent truncation, median gap duration, and occupancy and a model that includes only median gap duration and occupancy. Gap duration *p* is the significance of the difference in fit between a model that includes percent truncation, median gap duration, and occupancy and one that includes only percent truncation and occupancy. Values in bold are significant at the  $\alpha = 0.05$  level. It is not appropriate to include genera that experienced no truncation because it would require assigning these genera an arbitrarily short gap duration. Doing so would force a positive relationship between gap duration and extinction risk by including in each model a cohort of genera that had apparently very short gap durations and, because they experienced no truncation, relatively low extinction rates.

**Table S2. Comparison of observed late Katian extinctions with extinctions predicted for the late Katian interval by a random forest model trained on early Katian "background" extinction patterns**

| Laurentian Endemic? | Maximum paleolatitude | % truncation | Total genera | Predicted extinctions | Observed extinctions | Observed predicted |
|---------------------|-----------------------|--------------|--------------|-----------------------|----------------------|--------------------|
| Yes                 | <40°                  | <50%         | 70           | 29 (41%)              | 30 (43%)             | +1 (2%)            |
|                     |                       | ≥50%         | 90           | 53 (59%)              | 67 (74%)             | +14 (15%)          |
| No                  | <40°                  | <50%         | 66           | 2 (3%)                | 32 (48%)             | +30 (45%)          |
|                     |                       | ≥50%         | 155          | 56 (36%)              | 93 (60%)             | +37 (24%)          |
|                     | >40°                  | <50%         | 63           | 1 (2%)                | 7 (11%)              | +6 (9%)            |
|                     |                       | ≥50%         | 143          | 41 (29%)              | 45 (31%)             | +4 (2%)            |

Observed extinctions are substantially higher than predicted, particularly among genera that experienced relatively minor stratigraphic truncation but had no recorded high-latitude (>40°) occurrences. The excess extinction among these genera is not due to endemism, as the largest failure of prediction concerns the extinction rate of exclusively low latitude but nonendemic genera.

### Other Supporting Information Files

[Dataset S1 \(XLS\)](#)

[Dataset S2 \(XLS\)](#)
